1 What incentives encourage local communities to collect and upload mosquito sound  
2 data by using smartphones? A case study in the Democratic Republic of the Congo

3

4 Short Title: Incentives for citizen science data collection in the DRC

5

6 Kieran E. Storer<sup>1\*</sup>, Jane P. Messina<sup>2</sup>, Eva Herreros-Moya<sup>1</sup>, Emery Metelo<sup>3,4</sup>, Josué Zanga<sup>4</sup>, Nono M.  
7 Mvuama<sup>4</sup>, Soleil Muzinga<sup>4</sup>, Rinita Dam<sup>5</sup>, Marianne Sinka<sup>1</sup>, Ivan Kiskin<sup>6</sup>, Josh Everett<sup>1</sup>, Yunpeng Li<sup>7</sup>,  
8 Stephen Roberts<sup>8</sup>, and Katherine J. Willis<sup>1</sup>

9

## 10 Affiliations

11 <sup>1</sup> Department of Biology, University of Oxford, Oxford, United Kingdom

12 <sup>2</sup> School of Geography and the Environment, Oxford University Centre for the Environment,  
13 University of Oxford, Oxford, United Kingdom

14 <sup>3</sup> Department of Entomology, National Institute for Biomedical Research, M8R2+4WX, Kinshasa,  
15 Democratic Republic of the Congo

16 <sup>4</sup> Kinshasa School of Public Health, University of Kinshasa, H8Q3+2HV, Kinshasa, Democratic  
17 Republic of the Congo

18 <sup>5</sup> Warwick Medical School, University of Warwick, Coventry United Kingdom

19 <sup>6</sup> Surrey Institute for People-Centred AI, Centre for Vision Speech and Signal Processing, University  
20 of Surrey, Guildford, United Kingdom

21 <sup>7</sup> Centre for Oral, Clinical, and Translational Sciences, King's College London, London, United  
22 Kingdom

23 <sup>8</sup> Department of Engineering Science, University of Oxford, Oxford, United Kingdom

24

25 \*Corresponding Author

26

27 \*Corresponding Author

28 E-mail: [kieran.storer@biology.ox.ac.uk](mailto:kieran.storer@biology.ox.ac.uk)

29 Phone: +447851099304

30

### 31 Attribution

32 KES contributed to data curation, formal analysis, methodology, visualization, and writing the  
33 original draft. JPM contributed to formal analysis and visualization. EHM contributed to  
34 conceptualization, investigation, methodology, project administration, supervision, visualization,  
35 and the review and editing of the manuscript. EM, JZ, NMM, and SM contributed to  
36 conceptualization, investigation, methodology, data collection, and review and editing of the  
37 manuscript. RD, MS, IK, JE, YL, and SR contributed to conceptualization, methodology, and review  
38 and editing of the manuscript. KJW contributed to funding acquisition, methodology, supervision,  
39 and the review and editing of the manuscript.

40

### 41 Funding

42 This study was funded by the Bill and Melinda Gates Foundation Grant Award Number:  
43 OPP1209888.

44

45

46

## 47 Abstract

48 Malaria is one of the deadliest vector borne diseases effecting sub-Saharan Africa. A suite of  
49 systems are being used to monitor and manage malaria risk and disease incidence, with an  
50 increasing focus on technological interventions that allow private citizens to remotely record and  
51 upload data. However, data collected by citizen scientists must be standardised and consistent if it  
52 is to be used for scientific analysis. Studies that aim to improve data collection quality and quantity  
53 have often included incentivisation, providing citizen scientists with monetary or other benefits for  
54 their participation in data collection. We tested whether monetary incentives enhance participation  
55 and data collection in a study trialling an acoustic mosquito sensor. Working with the community in  
56 two health districts in the Democratic Republic of Congo, we measured data collection  
57 participation, completeness, and community responses. Our results showed mixed responses to the  
58 incentive, with more participants interested in the social status and monetary value of the  
59 technology used than the monetary incentive itself. The effect of incentives on data collection  
60 varied over the course of the trial, increasing participation in the start of the trial but with no effect  
61 in the latter half of the trial. Feedback from participants showed that opinions on technology,  
62 research objectives, and incentives varied between communities, and was associated with  
63 differences in data collection quantity and quality, suggesting that differences in community  
64 interest in data collection and the incentives may be more important than the incentive value itself.  
65 These results suggest that though there is an initial benefit, extrinsic motivations do not override  
66 differences in intrinsic motivations over time, and enhanced communication and dialogue with  
67 participants may improve citizen science participation and attitudes.

68

## 69 Introduction

70 Mobile phone usage in sub-Saharan Africa reached 489 million users in 2023, with smartphones  
71 making up 51% of mobile phones due to improvements in mobile phone access and network  
72 connections (1–3). With increasing smartphone ownership, their use for citizen science data  
73 collection has also increased in tandem, making use of the built-in camera, sensors, and GPS to  
74 generate and record data (4–7). Citizen science projects have ranged widely, and have been  
75 increasingly used in healthcare settings, including for monitoring diseases such as malaria by  
76 tracking outbreaks, monitoring drug stocks, reminding patients of medical appointments, and  
77 recording mosquito larval habitats and populations (for examples see: 8–15). As the amount and  
78 type of data collected by private citizens increases there are opportunities for developing high-  
79 resolution data repositories that widen citizen participation to include a greater range of  
80 demographic groups.

81

82 Previous research on citizen science data collection has shown that gathering data for research or  
83 healthcare purposes can help to improve educational outcomes (16), make data collectors feel  
84 more connected to their community (17), and improve health outcomes (18). But how do  
85 researchers motivate people to participate and collect high-quality data? Firstly, there is need to  
86 understand the roles that intrinsic and extrinsic motivations play in citizen scientist participation  
87 and data collection quality. Intrinsic motivation factors are 'people's spontaneous tendencies to be  
88 curious and interested, to seek out challenges and to exercise and develop their skills and  
89 knowledge, even in the absence of operationally separable rewards' (19). Intrinsic motivation is  
90 influenced by local and regional cultures, education, and familial values (20). In contrast, extrinsic  
91 motivators are 'behaviours done for reasons other than their inherent satisfactions' (21), such as  
92 monetary gain (22). Efforts to improve data collection typically target these different motivation

93 factors. Studies have shown that monetary incentives can be used in health care and ecological  
94 monitoring schemes to improve participation (23–27) and that intrinsic factors can be harnessed to  
95 improve data collection participation and quality by improving learning opportunities and using  
96 participant knowledge (28–31).

97

98 The complex spatiotemporal variability inherent to motivation factors (32,33) and the theoretical  
99 potential for a trade-off between them (21) make understanding their influence essential to  
100 improving data collection quality and scope while optimising resource allocation. To study  
101 participants' motivations and assess the functionality of incentive applications to promote  
102 community involvement in the collection of high-quality long-term biological data, we previously  
103 ran a data collection trial using incentives and SMS text reminders for collecting mosquito audio  
104 data in Tanzania using the HumBug tool (34). This tool is a smartphone audio sensor combined with  
105 a modified bed net designed to temporarily trap mosquitoes and guide them towards a budget  
106 smartphone running the MozzWear app that records the flight tone of host seeking mosquitoes  
107 overnight to determine the abundance and diversity of mosquitoes present using their sound (35)  
108 (Fig. 1).; For details on the Humbug tool, also see (36–42).

109

110 *Fig. 1: HumBug Tool configuration, showing the data collection, upload, and analysis pipeline (reproduced*  
111 *from Sinka et al., 2021).*

112

113 The smartphone app MozzWear used in the HumBug tool records mosquito flight tone data  
114 overnight and provides a secure connection to a server at the University of Oxford where the data  
115 is uploaded via the mobile or Wi-Fi data network. The data then runs through an algorithm pipeline  
116 that first detects the mosquito flight tone from background noise and then identifies the mosquito

117 species using their acoustic signature (35–37,40). As such, the HumBug tool is a good example of  
118 using smartphone technologies to provide an accessible biological data collection methodology to  
119 identify and monitor vectors of human disease - in this case, mosquitoes.

120

121 Previous work in Tanzania showed that providing homeowners with monetary incentives and SMS  
122 reminders to record and upload mosquito data did not significantly increase the number of uploads  
123 when compared to the control group (34). Instead, the study found that other factors influenced  
124 data collection efforts. However, it did not examine in detail what these other factors might be. To  
125 better understand, therefore, how extrinsic factors may affect data collection practices in the use of  
126 the HumBug tool, we ran a second data collection trial in a different community within two districts  
127 of the Democratic Republic of the Congo: Bandundu, and rural Kinshasa. In this study we aimed to  
128 test whether monetary extrinsic incentives encouraged: i) participant data collection activity during  
129 the trial period; ii) participant effort (the number of uploads per participant made during the  
130 sampling period, indicative of following trial protocols); and iii) the persistence of participation over  
131 time (whether trial participants continued to upload data throughout the sampling period). To  
132 address these questions, we compared participant activity (weeks active) and sampling effort  
133 (number of uploads) over the sampling period to assess differences in participation associated with  
134 receiving incentives for data collection.

## 135 **Methods**

136 The study ran from April to November of 2022 in two districts of the Democratic Republic of the  
137 Congo (DRC): rural Kinshasa, and Bandundu. Our collaborators at the University of Kinshasa and the  
138 University of Bandundu selected participants, conducted demographic surveys and pre- and post-  
139 trial focus group discussions, and ran the study. Data analysis and writing of the manuscript were  
140 carried out by the University of Oxford team. All leaders of communities, health zone officials, and

141 participants provided signed consent forms for the study, and the study was approved by the  
142 University of Oxford Tropical Research Ethics Committee and the University of Kinshasa Public  
143 Health Ethics Committee.

144

## 145 Study Locations

146 Geographically, the DRC covers an area of approximately 2,345,409 km<sup>2</sup>. The country is dominated  
147 by the Congo River basin surrounded by high plateaus, resulting in high precipitation and thick  
148 tropical forest within the basin and grassland in the plateaus above. In the DRC, malaria is a major  
149 cause of illness and death. Worldwide, 12% of the total malaria cases occurred in the DRC in 2022,  
150 causing 60% of hospital visits in the country (43,44).

151

152 Kinshasa is the capital city of the DRC and the largest city in central Africa. With ~16 million  
153 population it is the third largest mega-city on the continent. The Bandundu district has a total of  
154 143,435 people and covers an area of 222 Km<sup>2</sup> (Figure 2). Participants in our research were from  
155 the Bu and Mikondo health districts of Kinshasa, and the Trois Rivières and Caravane health districts  
156 of Bandundu.

157

158 *Fig. 2: Map of the Democratic Republic of Congo, showing the provinces of the DRC (45), the location of the*  
159 *trial districts (46) showing Bandundu in purple and Kinshasa in orange, with red points showing the location*  
160 *of study sites in the zoom inset, all visualised using QGIS 3.30.0 (47).*

161

162 Each district in our study had two trial sites: a control site and an incentive site. The selection of  
163 participants from our four trial sites took place from April 2 to June 30, 2022. In each health district,  
164 authorities of the different Health Zones, the village chiefs, and heads of districts were contacted to

165 gain permission for the study and to involve local leadership. Meetings with local leaders were  
166 carried out to plan the recruitment of households for the study, and to allocate which health  
167 districts would be the control treatment (Trois Rivières in Bandundu and Bu in Kinshasa) and the  
168 incentive treatment (Caravane in Bandundu and Mikondo in Kinshasa). These health districts will  
169 hereafter be referred to as a trial sites for clarity.

170

171 Households were recruited using a modified random walk technique from an entry point chosen  
172 from the main entrances to the village/street selected by local health district officials. From the  
173 entry point, the selection group progressed until the number of households required to participate  
174 at the site was met. Trial participants were admissible if they were 18+ years old, owned or had  
175 access to a personal mobile phone, were residents in Bandundu/Kinshasa throughout the study,  
176 and were willing and capable of providing a signed consent form.

177

178 Ahead of the trial, training of the interviewers and moderators took place over a day in each of the  
179 trial sites to teach local health officials and local leadership how to run interviews and support  
180 participants in the trial. Demonstrators were also taught how to install and use the HumBug tool  
181 and MozzWear App and were given a presentation of the trial objectives. Finally, interviewers were  
182 trained on how to administer the demographic questionnaires to participants who agreed to take  
183 part in the trial (DHS Phase 8 Questionnaire, S1 Appendix).

184 Moderators ran pre-trial focus group discussions (FGDs) to confirm that participants understood  
185 the purpose of the study, how the study was designed, and how to operate the HumBug tool and  
186 MozzWear application. The pre-trial FGDs were also used to discuss and understand the challenges  
187 that participants may face, their motivations for taking part in the study, and what they thought the  
188 impact would be on their lives. The pre- and post- trial FGD questions can be found in the S2



189 Appendix. The reasons participants gave for joining the study were categorized into common  
190 themes of access to electricity, financial incentive, use of a phone, provision of bed nets,  
191 contributing to health improvements and malaria control, or gaining personal knowledge.  
192 Participant FGDs responses were then structurally coded for analysis (48).

193

194 Control group participants were provided with the HumBug tool (a smartphone running the  
195 MozzWear app and the HumBug bed net), and one dollar to pay for an internet connection. The  
196 incentive group was provided with the HumBug tool and one dollar for an internet connection, and  
197 an additional ten dollars each month paid via airtime to their mobile phones. Participants were  
198 instructed to place the smartphone with the MozzWear app in the HumBug net and start the record  
199 function at 18:00 hrs and turn it off at 06:00 hrs on their allocated weekly recording day during the  
200 trial period (16 weeks total). Recordings were split at one-hour intervals automatically in the  
201 MozzWear app to prepare recordings for algorithmic analysis. As such a complete recording effort  
202 would show 12 recordings. The recordings were then uploaded by participants to the remote server  
203 when they connected to the internet. Once participants were taught how to use the Humbug tool  
204 there was no contact between the research team and the participants.

205

206 The research team conducted post-trial FGDs to understand the participants' experience of using  
207 the HumBug tool and participating in the study. Questions included whether they liked using the  
208 MozzWear app, whether they liked using the HumBug net, how the trial personally affected them,  
209 what they would want to be different about the trial in the future, whether they would participate  
210 in the future, and if they received an incentive whether it was enough money. Data from the post-  
211 trial FGDs was coded for analysis by themes of response to questions as described for the pre-trial  
212 FGDs.

213

## 214 Data Analysis

215 To compare the effect of providing incentives to the participants to upload mosquito audio data,  
216 the number of active participants (participants who uploaded any data) and the number of uploads  
217 were counted during each trial week. Participant identification numbers were used to assess the  
218 upload counts and weekly activity by location (Kinshasa or Bandundu districts) and experimental  
219 group (control or incentive). Counts of uploads, weeks of participation, and the average number of  
220 participants each week were compared using Wilcoxon Rank Sum tests (49) and Kruskal-Wallis tests  
221 (50) with a post-hoc Dunn test (51) to assess if there was a significant difference in participation  
222 between the experimental groups/locations over the study period. The number of participant  
223 uploads was broken down for each week of the trial to assess whether incentives improved data  
224 collection persistence throughout the study and was also compared using Wilcoxon Rank Sum  
225 Tests. Data on income, sex, age, education, and profession were also evaluated as explanatory  
226 variables to explain variation in data collection between groups. Comparisons of the demographic  
227 data of each district, trial group, and combination of the two, were made using Wilcoxon Rank Sum  
228 tests and Chi-squared tests. The pretrial FGD data was analysed using Wilcoxon Rank Sum tests to  
229 compare differences in pre-trial motivations for participation. The post-trial FGD data was analysed  
230 using a Fisher's Exact Test to assess the correlation between district and trial groups on attendance  
231 for the post-trial FGD and whether participants would take part in a future trial, and phone return.  
232 All plots were produced using ggplot2 (52).

233

## 234 Data management

235 Personal data generated in the form of signed consent forms, personal mobile phone numbers,  
236 interviews, and/or focus group audio recordings, were stored following the 2018 Data Protection  
237 Act on a secure administrative database on a University of Oxford server.

238

## 239 Results

### 240 Pre-Trial Focus Group Discussions

241 Pre-trial focus group discussions (FGDs) were run in three groups of 12-13 participants in each trial  
242 site (37 people per trial site, 148 participants in total). In the pre-trial FGDs, themes identified for  
243 participant motivation were monetary benefit (63.5% of all participants), contributing to  
244 science/health (33.1%), having a phone (29.7%), electricity access (27.0%) (not a component of this  
245 study), the HumBug net (6.7%), and gaining personal knowledge (5.4%). Statistical comparisons  
246 using Wilcoxon Rank Sum Tests showed that trial site participants in Kinshasa mentioned electricity  
247 significantly more as a reason to participate in the trial compared to Bandundu trial site participants  
248 ( $W = 3774$ ,  $p\text{-value} < 0.001$ ). Comparing treatment groups across both districts, electricity access  
249 was mentioned more frequently in the control groups compared to the incentive groups ( $W = 2072$ ,  
250  $p\text{-value} < 0.001$ ). Between the treatment groups in Bandundu, electricity was more frequently  
251 mentioned by the control group (control  $n=6$ , incentive  $n=0$ ;  $W = 795.5$ ,  $p\text{-value} = 0.012$ ) and  
252 personal knowledge (on topics such as mosquito control and malaria prevention) was more  
253 commonly cited by the incentive group (control  $n=0$ , incentive  $n=4$ ;  $W = 610.5$ ,  $p\text{-value} = 0.042$ ). In  
254 Kinshasa, the control group mentioned electricity (control  $n = 23$ , incentive  $n = 11$ ;  $W = 906.5$ ,  $p\text{-}$   
255  $\text{value} = 0.005$ ) and contributing to science/health (control  $n = 15$ , incentive  $n = 6$ ;  $W = 851$ ,  $p\text{-value} =$

256 0.022) significantly more than the incentive group. There were no other significant differences  
257 between districts, trial groups, or the trial groups within districts (p-value>0.05).

258

## 259 Demographic Survey

260 Demographic survey data were assessed to identify if they contributed to differences in recording  
261 ability between districts, treatment groups, and treatment groups within districts. There were  
262 significantly more adults in the homes of participants in the Kinshasa district sites compared to the  
263 Bandundu district sites ( $W = 1680$ , p-value = 0.017). Between the treatment groups in both districts,  
264 there were no significant differences in any demographic response variables. Within Kinshasa, there  
265 was significantly less water scarcity in the control group (29% experiencing water scarcity), and  
266 compared to the incentive group (45% experiencing water scarcity) (odds ratio = 0.09, p-value =  
267 0.021) and there was a significant difference in the method of home lighting, with significantly  
268 more homes in the control group using a rechargeable flashlight, torch, or lantern (p-value = 0.016).  
269 Within Bandundu there were significantly more children in the incentive group compared to the  
270 control group ( $W = 675$ , p-value = 0.024), with one more child per house in the study on average.  
271 Additionally, there was a significant difference in toilet types between the Bandundu trial groups  
272 (p-value = 0.033). These were the only cases out of 88 comparisons that were significantly different  
273 between districts and trial groups (S3 Table).

274

## 275 Comparing Districts and Trial Groups

276 Some participants decided to withdraw from the trial during its course and others failed to upload  
277 data, resulting in overall participation of 33 from the control group and 31 from the incentive group  
278 in the Kinshasa districts (n=64), and 33 from the control group and 35 from the incentive group in

279 Bandundu districts (n=68), totalling 132 participants. The withdrawal rate from the study was 7.4%  
280 from the control sites and 10.4% from incentive sites across both districts. The reasons cited for  
281 formal withdrawal from the trial were lack of monetary benefit, unplanned move from the trial  
282 area, and loss of the smartphone. Comparisons in participation between trial districts using  
283 Wilcoxon Continuity tests showed that Bandundu participants uploaded data more weeks of the  
284 trial period ( $W = 1589$ ,  $p < 0.001$ ) and had more total uploads ( $W = 1825.5$ ,  $p = 0.009$ ), than  
285 participants in Kinshasa, shown in Figure 3.

286

287 *Fig. 3: Comparison of a) the total number of uploads per participant in Bandundu and Kinshasa and b) the*  
288 *number of weeks that each participant was active in Bandundu and Kinshasa. Bandundu is shown in red, and*  
289 *Kinshasa is shown in blue. Boxes show the interquartile range (IQR), with whiskers showing the upper and*  
290 *lower 25% of the data, and points showing the outliers.*

291

292 Comparing treatment groups across both districts there was no difference in participation between  
293 the control group and the incentive group for either total uploads ( $W = 2409.5$ ,  $p\text{-value} = 0.88$ ), or  
294 participation weeks ( $W = 2510.5$ ,  $p\text{-value} = 0.79$ ). Within Kinshasa there was no significant  
295 difference between treatment groups in either uploads ( $W = 418.5$ ,  $p\text{-value} = 0.057$ ) or weeks of  
296 activity ( $W = 428$ ,  $p\text{-value} = 0.073$ ). In Bandundu, there were significantly more total uploads in the  
297 control group compared to the incentive group ( $W = 845.5$ ,  $p\text{-value} = 0.026$ ) but no significant  
298 difference in the average number of active weeks of each participant ( $W = 777$ ,  $p\text{-value} = 0.13$ )  
299 (Table 1). There were no significant relationships found between in the demographic variables that  
300 were captured in the demographic questionnaire survey and the number of uploads or weeks of  
301 activity.

302

303 Table 1: Results of the Mann Whitney-U Tests for the trial group comparisons, with \* to denote significance,  
 304  $p$ -value < 0.05 \*,  $p$ -value < 0.01 \*\*.

| Comparison | Response Variable | Group     | Mann-Witney U | Median    | IQR          | P-Value      |          |
|------------|-------------------|-----------|---------------|-----------|--------------|--------------|----------|
| District   | Uploads           | Kinshasa  | W=1825.5      | 117.5     | 79.75-161.75 | 0.009486***  |          |
|            |                   | Bandundu  |               | 160       | 107-186      |              |          |
|            | Weeks             | Kinshasa  | W=1589        | 11        | 8-14.25      |              |          |
|            |                   | Bandundu  |               | 15        | 12-16        |              |          |
| Treatment  | Uploads           | Control   | W=2409.5      | 136       | 73-186       | 0.8822       |          |
|            |                   | Incentive |               | 140       | 94.5-172.5   |              |          |
|            | Weeks             | Control   | W = 2510.5    | 13        | 7-16         |              |          |
|            |                   | Incentive |               | 13        | 10-15        |              |          |
| Bandundu   | Treatment         | Uploads   | W=845.5       | Control   | 180          | 122.25-193.5 | 0.02643* |
|            |                   |           |               | Incentive | 149.5        | 91-177.75    |          |
|            | Weeks             | Control   | W=777         | 16        | 12-16        |              |          |
|            |                   | Incentive |               | 13.5      | 11.5-16      |              |          |
| Kinshasa   | Treatment         | Uploads   | W=418.5       | Control   | 99           | 62-164       | 0.05705  |
|            |                   |           |               | Incentive | 140          | 96.5-160     |          |
|            | Weeks             | Control   | W=428         | 11        | 6-14         |              |          |
|            |                   | Incentive |               | 12        | 10-14.5      |              |          |

305

306

### 307 Activity and Effort over Time

#### 308 Activity Persistence

309 The percentage of active participants was catalogued weekly to assess whether the monetary  
 310 incentive affected persistence in data collection over the trial period (Fig. 4). At the start of the trial,  
 311 the Kinshasa incentive group had the highest participation (87.1%), followed by the Bandundu  
 312 incentive (83.3%), Bandundu control (80.5%), and Kinshasa control (70.3%). Participation was  
 313 approximately stable for the first half of the trial before declining from week 8. At the end of the

314 trial both the Kinshasa control and Kinshasa incentive group had dropped to 30-35% participation,  
315 Bandundu incentive dropped to 50% participation, and Bandundu control maintained 77.7%  
316 participation.

317

318 *Fig. 4: The percentage of participants that activated the MozzWear app in each trial group during each week*  
319 *in the trial. The coloured lines coordinate with trial groups, showing Bandundu control in orange, Bandundu*  
320 *incentive in green, Kinshasa control in pink, and Kinshasa incentive in blue. Lines were fitted using locally*  
321 *estimated scatterplot smoothing (LOESS), with the 95% confidence interval for each treatment group*  
322 *indicated in grey.*

323

324 Data Collection Effort

325 Data collection effort over the trial showed that in the first week the Kinshasa incentive group had  
326 the highest average uploads per active participant (12.26) followed by the Bandundu control  
327 (11.69), Bandundu incentive (10.83), and Kinshasa control (10.54). Data collection effort declined at  
328 around week seven, and at the end of the trial, the upload effort dropped for all groups, finishing in  
329 descending order with Bandundu control (11.29), Bandundu incentive (10.39), Kinshasa incentive  
330 (10.8), and Kinshasa control (9.23). Over the course of the study, Bandundu had significantly more  
331 uploads per participant compared to Kinshasa ( $W = 1825.5$ ,  $p\text{-value} = 0.009$ ), and the Bandundu  
332 control group had higher data collection effort than the incentive group ( $W=845.5$ ,  $p\text{-value} = 0.026$ ).  
333 but there was no significant difference between the control and incentive groups overall or within  
334 Kinshasa. Figure 5 below shows the weekly comparisons in data collection effort over the course of  
335 the trial between the trial districts, treatment types, and treatments within districts. Bandundu had  
336 a trend of higher uploads in weeks 2-4, 8, and 11 ( $p\text{-value} < 0.1$ ), and significantly higher uploads in  
337 weeks 9, 10, and 12-16 ( $p\text{-value} < 0.05$ ) compared to the Kinshasa groups. Comparisons of the

338 treatment groups showed that the control groups had higher participation than the incentive  
339 groups in the final three weeks of the trial ( $p$ -value  $< 0.05$ ). Within Bandundu, the control group had  
340 higher participation in weeks 14 and 16 of the trial compared to the incentive group ( $p$ -value  
341  $< 0.05$ ), and within Kinshasa, the control group had trends of lower participation than the incentive  
342 group in weeks 1 and 9 of the trial ( $p$ -value  $< 0.1$ )

343

344 *Fig. 5: Week-to-week comparisons of collection effort between the trial districts, and incentive and control*  
345 *groups overall and within Kinshasa and Bandundu. The magnitude of the bars shows the difference in*  
346 *uploads per person from the first group in panel subtitle relative to the second. Non-significant differences*  
347 *are shown in grey; trends are shown in green ( $p$ -value  $< 0.1$ ), significant results in yellow ( $p$ -value  $< 0.05$ ), and*  
348 *highly significant differences are shown in red ( $p$ -value  $< 0.001$ ). The whiskers around each bar show the*  
349 *standard error.*

350

### 351 Post-Trial Focus Group Discussions

352 The focus group discussions after the trial were attended by 27 participants from Kinshasa and 26  
353 from Bandundu equating to ~35% of the original trial participants. In comparison to the 12 pre-trial  
354 FGDs, only 6 post-trial FGDs were run. Post-trial FGD attendance was lower in the Kinshasa  
355 incentive group compared to other groups ( $n = 8$ ,  $p$ -value = 0.098, 95% CI: [0.0995, 1.2767] odds  
356 ratio: 0.368). All returning participants indicated that they had positive experiences with the  
357 HumBug sensor and a positive experience with the HumBug bed nets. When asked about the effect  
358 of the trial on their life, a respondent from the Bandundu incentive site said, "I was doing this work  
359 without someone to command me (...) it gave me the sense of responsibility."

360



361 There was a lower interest in future participation for control groups (n=12) compared to the  
362 incentive groups (n=25), and lower interest in future participation in Kinshasa (44.4% of  
363 respondents) compared to Bandundu (96.2% of respondents). Both district and trial group were  
364 significantly associated with participants interest in future participation (p-value < 0.001, 95% CI:  
365 [1.801, 5.468], odds ratio: 3.102), showing that in Bandundu the control group was 10% less likely  
366 to say they would participate in the future than the Bandundu incentive group, and in Kinshasa the  
367 control group was 60% less likely to participate in the future compared to the Kinshasa incentive  
368 group.

369

370 When asked about challenges or things they wanted to change in the trial, electricity access was  
371 mentioned more frequently in the Kinshasa incentive group (W = 32, p-value = 0.007) and the  
372 Bandundu control group (W = 129, p-value = 0.008) compared to the other trial group in their  
373 respective districts. Financial compensation/increased compensation was mentioned by 17  
374 respondents, but did not vary significantly between trial groups. When queried on how to improve  
375 the study, a respondent indicated a desire for more interaction and information, "When we send  
376 the data, on your part, we need a sign to know if the data has arrived or not (...) until the end, we  
377 had no communication."

378

379 Finally, only participants in the Kinshasa control group mentioned wanting to keep the smartphone  
380 (n=12). Despite not being discussed in other post-trial FGDs, phone retention was an issue at the  
381 end of the study. In total, there were 33 phones retained by participants across the districts, with a  
382 higher likelihood for the Kinshasa incentive group and for the Bandundu control group to retain  
383 phones, compared to the other trial group in their district (p-value=0.00516, 95% CI [1.567, 74.361],  
384 odds ratio: 9.177). Additionally, nine phones were reported as lost or stolen by the end of the trial

385 period. As one participant phrased it from the control trial group in Kinshasa, “I want to be left with  
386 the phones because we will be laughed at (...) if you take them away from us, they will say that we  
387 participated in vain.”

388

## 389 Discussion

390 Our results demonstrate that in the DRC there was no significant difference in the number of audio  
391 recordings uploaded or the number of weeks that participants were active between the groups  
392 receiving financial incentives and the groups that did not. The previous HumBug study in Tanzania  
393 similarly showed no significant effect of incentives (monetary incentives, text message reminders,  
394 or their combination) on the total audio recordings uploaded (34). We found there was no  
395 significant effect of demographics such as age, sex, or income on the number of uploads or  
396 participation weeks, nor were there significant differences in these demographic traits between the  
397 districts, trial groups, or trial groups within districts. The only significant effect on the number of  
398 uploads and active weeks was study location which showed that participation was overall higher in  
399 Bandundu compared to Kinshasa, and a difference between the control and treatment group  
400 uploads in Bandundu due to a higher recording effort of the control group. This suggests that  
401 differences between the districts are not attributable to demographic effects, and instead, there  
402 may be other differences, such as intrinsic motivations or community leadership, resulting in higher  
403 numbers of uploads in Bandundu compared to the Kinshasa sites.

404

405 Our study results also show that incentivisation did not significantly affect audio uploads or activity  
406 within Kinshasa and showed that the control group had more audio uploads in Bandundu compared  
407 to the incentive group. Previous studies have shown that if incentivised actions align with social  
408 norms, incentives can bolster desired behaviours (53), however, incentives can also weaken

409 participants' intrinsic motivations—a phenomenon known as the 'crowding out' effect. This occurs  
410 when the anticipated intrinsic benefits of participation, such as the satisfaction of contributing, are  
411 diminished by the introduction of external incentives (54). The lack of response to incentives in our  
412 study suggests that incentives were neither supporting intrinsic motivations nor diminishing them.  
413 Notably, for logistical reasons this trial used individual health districts as trial groups. Differences in  
414 response to incentives may be more strongly attributed to local culture and attitudes than  
415 treatment group. In the future, a randomised control trial that assesses participants' existing  
416 motivations could more effectively capture variations both among and within localities engaged in  
417 data collection. Additionally, further work is needed to understand what the tipping points are for  
418 incentives to significantly motivate participation, and what behaviours may either be unaffected by  
419 incentivisation or diminished by it.

420

421 Although incentives did not affect the overall number of data uploads across districts, there were  
422 differences in the persistence of data collection participation and effort. The participation  
423 persistence of the trial groups showed that the Bandundu control group had approximately the  
424 same amount of participation from the start to the end of the trial, but that the other three trial  
425 groups experienced significant declines in the latter half of the trial. A review paper of citizen  
426 science studies found that studies that provided long term training and contact with organisers  
427 were the most successful at engaging participants (55). The declines in robust participation towards  
428 the end of the trial in our study may be attributed to the lack of engagement with participants that  
429 was necessary to test the usability of the data collection methodology with low intervention. The  
430 low contact resulted in several post-trial focus group respondents indicating they would have liked  
431 more contact, despite all participants saying the sensor and application were easy to use. Although  
432 participants had positive attitudes regarding the data collection and responsibility (supporting

433 results from other studies (56)) access to data and collaborators may further improve participants'  
434 feelings about their participation and their contributions (57).

435

436 Participant-researcher contact may be why our previous trial in Tanzania found that text reminders,  
437 both alone and paired with an incentive, positively affected persistence in data collection, despite  
438 the monetary incentive alone not showing a significant effect in that study system (34). The  
439 declines in participation persistence and effort seen in this study support this previous finding that  
440 incentives alone are not enough to motivate participation. The tipping point in the middle of the  
441 study where participation dropped suggests that participants do not need further encouragement  
442 or motivation in the short term to collect Humbug data. In longer term contexts however,  
443 consistent contact and communication may be necessary to continue to motivate participants, and  
444 we have found that monetary incentives do not accomplish this, and in fact appear to only increase  
445 participation in the early phases of the study.

446

447 The differences in upload effort between our trial groups did not follow patterns relating to  
448 incentivisation. The data collection effort in Bandundu shows that the control group performed  
449 similarly to the incentive group for most of the trial, with the control group performing significantly  
450 better in the final couple of weeks. This appears to be due to a continued high level of data  
451 collection persistence and effort on the part of the Bandundu control group, which seems to be  
452 attributable to some intrinsic difference in this site compared to the other sites. In Kinshasa,  
453 incentivisation improved data collection efforts in the early parts of the trial compared to the  
454 control group, suggesting that at the time when participants were overall the most active, the  
455 incentive did improve the completeness of data collection efforts. However, this higher level of  
456 data collection effort by Kinshasa's incentive group dropped approximately halfway through the

457 trial, after which there was not a significant difference between the control and incentive groups.  
458 This mirrors the results for participant activity, which showed that participation significantly  
459 dropped off halfway through. The decline in data collection efforts shows that even those who are  
460 continuing to participate are not collecting data for the entire time period (6 pm to 6 am) as  
461 requested in the data collection methodology. This may be in part due to the design of our  
462 incentives, which were given regardless of activity and were not scaled for completeness of  
463 participation. This result shows that despite incentivisation initially appearing to motivate complete  
464 data collection in one of our districts, the diminishing interest and effort over time are not  
465 overcome by incentivisation.

466

467 Our post-trial FGDs gave insight into issues surrounding incentives, including compensation and  
468 technology. Over half of the participants in the trial did not return for the post-trial FGDs. The  
469 reasons cited by the DRC team were a desire to keep the smartphone and the lack of payment at  
470 the control sites, though there were more post-trial FGD attendees from the control groups than  
471 the incentive groups. This compensation issue was emphasised by a refusal to return the phones by  
472 some participants in trial groups in both districts. The Bandundu control group exhibited higher  
473 phone retention compared to the Bandundu incentive group, and the Kinshasa incentive group  
474 showed higher phone retention in contrast to the Kinshasa control group. There was no significant  
475 difference in the number of participants that named phone retention as a motive for participation  
476 between the districts, the trial groups, or between the trial groups within districts, showing that  
477 previously held values were not associated with phone retention. Instead, the pattern of phone  
478 retention mirrored the activity levels of each trial group, perhaps indicating that the more active  
479 participants felt a stronger entitlement to keeping the phones. However, phone retention was  
480 related to the relative effort in each district, rather than the overall effort. For example, the

481 Bandundu incentive and the Kinshasa incentive had similar activity levels and total uploads, yet the  
482 Kinshasa incentive group retained twice the number of phones. As far as we are aware, participants  
483 in each district and trial group did not know the participation rates of the other groups, and  
484 therefore, did not know their relative participation. This indicates that individuals' participation  
485 might be influenced by their perception of effort.

486

487 The phone retention and refusal to return at the end of the study is an example of how citizen  
488 science projects can deviate from planned outcomes. In this context, participants effectively  
489 provided themselves with an incentive (or supplementary incentive) by refusing to return phones,  
490 despite study agreements and information about compensation ahead of the trial. A study on  
491 citizen science with specially designed video games found that game design can diminish citizen  
492 science outcomes and enhance the odds of cheating and cutting corners, depending on the ability  
493 to do so (58). It is important to consider how incentive application design therefore may influence  
494 study outcomes and participation. The incentive group in this case received payment regardless of  
495 participation, which may have opened this study system to cutting corners (e.g., reduced activity  
496 and upload effort at the end of the study period). As an alternative, incentives given in response to  
497 data collection activity close this loophole and effectively encourage data collection persistence.  
498 Additionally, the post-trial survey in this study was not incentivised, and therefore participants  
499 gained more from refusing to return phones than they did from attending. Balancing incentive  
500 value with requests and alternatives is necessary for incentives to operate as intended, and as seen  
501 in this study, some individuals will not follow prescriptive actions if they feel they can benefit in  
502 other ways.

503

504 Our post-trial FGDs revealed that despite there not being a significant or differential response to  
505 incentivisation, there were significant contrasting attitudes between the study groups in Bandundu  
506 and those in Kinshasa. Bandundu exhibited a significantly higher overall participation rate in FGDs  
507 compared to Kinshasa, and a greater proportion of Bandundu participants expressed willingness to  
508 partake in the trial again, irrespective of incentivisation (25 out of 26 post-trial FGD attendees). Out  
509 of 27 post-trial FGD attendees from Kinshasa, only 12 indicated a willingness to participate again.  
510 Additionally, there appear to be differences in values between the two districts. Among the 16  
511 participants who identified knowledge as their motive for future participation, only one was from  
512 Kinshasa. Conversely, among Kinshasa participants who expressed willingness to participate again,  
513 the majority cited incentives as their driving factor. Further research is needed to understand how  
514 community and culture interact with incentive application, but in this case, despite differing  
515 motivations for participation, incentives did not have any significant effects on overall participation  
516 in the study.

517

518 The biggest issues cited by participants who took part in the trial were access to electricity to  
519 charge the smartphone sensor and internet connection. Interestingly, the groups that mentioned  
520 access to electricity significantly more were also the groups that performed best for data collection  
521 activity and effort in each district. It could be that the practicality of it was more apparent to the  
522 groups that put more effort in, and practical difficulties may be part of the reason people felt they  
523 should have been compensated better for the study. Of the incentive group participants who  
524 attended the focus group, over half said they felt they had not been given enough money for the  
525 study (14/22). This dissatisfaction may have been due to the unexpected cost of transferring  
526 money, which reduced the originally stated compensation (from \$10 to \$9). In pre-trial FGDs, there  
527 were only six cases when participants who cited money as their motivation asked for a monetary

528 value at or below the incentive value given in the study, suggesting that the incentive potentially  
529 fell below common expectations.

530

531 Despite the sentiment that the money was not enough, incentive group participants were more  
532 likely to say they would participate in the future than control group participants, and although bed  
533 nets were one of the least cited reasons for participating in the study, almost all participants  
534 mentioned the bed nets as a benefit they experienced in the trial, perhaps improving their desire to  
535 continue participation. Considering that all phones were turned on and collected data at least once  
536 during the study period, it appears useability was not a limiting factor of the study, and indeed all  
537 participants apart from one said that they felt the MozzWear app was easy to use. Due to the lack  
538 of practical issues with the study, our results highlight the importance of scaling expectations of  
539 citizen science and matching the value of incentives with the effort and length of trials to improve  
540 participation and satisfaction.

541

## 542 Conclusions

543 Results of this study show that in this study system incentives did not have significant effects on  
544 data collection activity throughout the trial but did have some effect on data collection persistence  
545 and effort, improving data collection effort during portions of the trial in one of our study districts.  
546 Our results indicate that community differences are what drive the trends in participation in this  
547 study system, and that more information is needed ahead of trials to assess how community  
548 differences may impact participation in citizen science data collection. Participant engagement with  
549 researchers and study organisers appears to improve data collection, particularly in longer studies.  
550 Communication with participants is important for appropriately scaling incentives to account for  
551 citizen data collection effort. Systems should be designed appropriately to maximise the alignment



552 of incentives with active data collection. Overall, the incentives tested do not appear to significantly  
553 improve data collection in this study system, and in this case, increased engagement during data  
554 collection may have improved outcomes. With technology becoming an increasingly used tool in  
555 citizen science, its application should be considered in reference to existing infrastructure.  
556 Consideration should be made for the value that the technology represents in reference to the  
557 overall value of the incentive being offered to avoid issues with data sensor retention in response  
558 to changing attitudes towards incentive value.

559

## 560 Acknowledgements

561 Thank you to the DRC team at Kinshasa School of Public Health and University of Bandundu and to  
562 Paul Mansiangi, who has since passed away, for organising and co-ordinating the study. We are  
563 grateful to the community leaders, health zone officials, and all the participants from Trois Rivières,  
564 Caravane, Bu and Mikondo for their support and participation in the study.

565

## 566 Ethics Approval and Consent

567 The University of Oxford have sponsored the study. This study was reviewed by the Oxford Tropical  
568 Research Ethics Committee (OxTREC) and approved by the Kinshasa School of Public Health.  
569 Informed written consent was obtained from all interviewees prior to the focus group discussions  
570 and the quantitative feedback survey. Consent forms signed by all the participants included the  
571 release of summary findings and details of individual responses from this study. Potential  
572 participants were informed of the voluntary nature of the study and had at least 24 hours to  
573 consider taking part. Efforts were made to create a safe place for sharing experiences during the  
574 focus group discussions.

575

## 576 References

- 577 1. GSMA. GSMA | The Mobile Economy - Sub-Saharan Africa 2017 - GSMA Sub Saharan  
578 Africa [Internet]. 2017 [cited 2023 Aug 28]. Available from:  
579 [https://www.gsma.com/subsaharanafrica/resources/mobile-economy-2017-sub-saharan-](https://www.gsma.com/subsaharanafrica/resources/mobile-economy-2017-sub-saharan-africa-2017)  
580 [africa-2017](https://www.gsma.com/subsaharanafrica/resources/mobile-economy-2017-sub-saharan-africa-2017)
- 581 2. GSMA. GSMA | The State of Mobile Internet Connectivity Report 2019 | Mobile for  
582 Development [Internet]. 2019 [cited 2023 Aug 28]. Available from:  
583 [https://www.gsma.com/mobilefordevelopment/resources/the-state-of-mobile-internet-](https://www.gsma.com/mobilefordevelopment/resources/the-state-of-mobile-internet-connectivity-report-2019/)  
584 [connectivity-report-2019/](https://www.gsma.com/mobilefordevelopment/resources/the-state-of-mobile-internet-connectivity-report-2019/)
- 585 3. ITU Hub. Measuring digital development: Facts & figures 2019 - ITU Hub [Internet]. 2019  
586 [cited 2023 Aug 28]. Available from: [https://www.itu.int/hub/2020/05/measuring-digital-](https://www.itu.int/hub/2020/05/measuring-digital-development-facts-figures-2019/)  
587 [development-facts-figures-2019/](https://www.itu.int/hub/2020/05/measuring-digital-development-facts-figures-2019/)
- 588 4. Baxter C, Carroll JA, Keogh B, Vandelanotte C. Assessment of Mobile Health Apps Using  
589 Built-In Smartphone Sensors for Diagnosis and Treatment: Systematic Survey of Apps Listed

- 590 in International Curated Health App Libraries. *JMIR Mhealth Uhealth*. 2020 Feb  
591 3;8(2):e16741.
- 592 5. Kamel Boulos MN, Brewer AC, Karimkhani C, Buller DB, Dellavalle RP. Mobile medical and  
593 health apps: state of the art, concerns, regulatory control and certification. *Online J Public*  
594 *Health Inform*. 2014 Feb 5;5(3).
- 595 6. Lee SH, Nurmatov UB, Nwaru BI, Mukherjee M, Grant L, Pagliari C. Effectiveness of mHealth  
596 interventions for maternal, newborn and child health in low- and middle-income countries:  
597 Systematic review and meta-analysis. *J Glob Health [Internet]*. 2016 [cited 2023 Aug  
598 28];6(1). Available from: [/pmc/articles/PMC4643860/](https://pubmed.ncbi.nlm.nih.gov/31111111/)
- 599 7. Lee Ventola C. Mobile Devices and Apps for Health Care Professionals: Uses and Benefits.  
600 *Pharmacy and Therapeutics [Internet]*. 2014 [cited 2023 Aug 28];39(5):356. Available from:  
601 [/pmc/articles/PMC4029126/](https://pubmed.ncbi.nlm.nih.gov/25111111/)
- 602 8. Barrington J, Wereko-Brobby O, Ward P, Mwafongo W, Kungulwe S. SMS for Life: a pilot  
603 project to improve anti-malarial drug supply management in rural Tanzania using standard  
604 technology. *Malar J*. 2010 Dec 27;9(1):298.
- 605 9. Davis RG, Kamanga A, Castillo-Salgado C, Chime N, Mharakurwa S, Shiff C. Early detection  
606 of malaria foci for targeted interventions in endemic southern Zambia. *Malar J [Internet]*. 2011  
607 Sep 12 [cited 2023 Aug 28];10(1):1–12. Available from:  
608 <https://malariajournal.biomedcentral.com/articles/10.1186/1475-2875-10-260>
- 609 10. Francis F, Ishengoma DS, Mmbando BP, Rutta ASM, Malecela MN, Mayala B, et al.  
610 Deployment and use of mobile phone technology for real-time reporting of fever cases and  
611 malaria treatment failure in areas of declining malaria transmission in Muheza district north-  
612 eastern Tanzania. *Malar J [Internet]*. 2017 Aug 1 [cited 2023 Aug 28];16(1). Available from:  
613 <https://pubmed.ncbi.nlm.nih.gov/28764792/>
- 614 11. Gibson DG, Ochieng B, Kagucia EW, Were J, Hayford K, Moulton LH, et al. Mobile phone-  
615 delivered reminders and incentives to improve childhood immunisation coverage and  
616 timeliness in Kenya (M-SIMU): a cluster randomised controlled trial. *Lancet Glob Health*

- 617 [Internet]. 2017 Apr 1 [cited 2023 Aug 28];5(4):e428–38. Available from:  
618 <https://pubmed.ncbi.nlm.nih.gov/28288747/>
- 619 12. Kamanga A, Moono P, Stresman G, Mharakurwa S, Shiff C. Rural health centres,  
620 communities and malaria case detection in Zambia using mobile telephones: A means to  
621 detect potential reservoirs of infection in unstable transmission conditions. *Malar J* [Internet].  
622 2010 Apr 15 [cited 2023 Aug 28];9(1):1–7. Available from:  
623 <https://malariajournal.biomedcentral.com/articles/10.1186/1475-2875-9-96>
- 624 13. Kaunda-Khangamwa BN, Steinhardt LC, Rowe AK, Gumbo A, Moyo D, Nsona H, et al. The  
625 effect of mobile phone text message reminders on health workers' adherence to case  
626 management guidelines for malaria and other diseases in Malawi: lessons from qualitative  
627 data from a cluster-randomized trial. *Malar J* [Internet]. 2018 Dec 19 [cited 2023 Aug  
628 28];17(1). Available from: <https://pubmed.ncbi.nlm.nih.gov/30567603/>
- 629 14. Meankaew P, Kaewkungwal J, Khamsiriwatchara A, Khunthong P, Singhasivanon P, Satimai  
630 W. Application of mobile-technology for disease and treatment monitoring of malaria in the  
631 “Better Border Healthcare Programme.” *Malar J* [Internet]. 2010 Aug 19 [cited 2023 Aug  
632 28];9(1):1–14. Available from: <https://link.springer.com/articles/10.1186/1475-2875-9-237>
- 633 15. Wakadha H, Chandir S, Were EV, Rubin A, Obor D, Levine OS, et al. The feasibility of using  
634 mobile-phone based SMS reminders and conditional cash transfers to improve timely  
635 immunization in rural Kenya. *Vaccine* [Internet]. 2013 Jan 30 [cited 2023 Aug 28];31(6):987–  
636 93. Available from: <https://pubmed.ncbi.nlm.nih.gov/23246258/>
- 637 16. Roche J, Bell L, Galvão C, Golumbic YN, Kloetzer L, Knoblen N, et al. Citizen Science,  
638 Education, and Learning: Challenges and Opportunities. *Frontiers in Sociology*. 2020 Dec  
639 2;5:613814.
- 640 17. Conrad CC, Hilchey KG. A review of citizen science and community-based environmental  
641 monitoring: Issues and opportunities. *Environ Monit Assess* [Internet]. 2011 May 17 [cited  
642 2023 Oct 2];176(1–4):273–91. Available from:  
643 <https://link.springer.com/article/10.1007/s10661-010-1582-5>

- 644 18. Den Broeder L, Devilee J, Van Oers H, Schuit AJ, Wagemakers A. Citizen Science for public  
645 health. *Health Promot Int* [Internet]. 2018 Jun 1 [cited 2023 Oct 2];33(3):505–14. Available  
646 from: <https://dx.doi.org/10.1093/heapro/daw086>
- 647 19. Di Domenico SI, Ryan RM. The emerging neuroscience of intrinsic motivation: A new frontier  
648 in self-determination research. *Front Hum Neurosci*. 2017 Mar 24;11:247005.
- 649 20. Hennessey B, Moran S, Altringer B, Amabile TM. Extrinsic and Intrinsic Motivation. *Wiley*  
650 *Encyclopedia of Management*. 2015 Jan 21;1–4.
- 651 21. Ryan RM, Deci EL. Intrinsic and extrinsic motivation from a self-determination theory  
652 perspective: Definitions, theory, practices, and future directions. *Contemp Educ Psychol*.  
653 2020 Apr 1;61.
- 654 22. Aceves-Bueno E, Adeleye AS, Bradley D, Tyler Brandt W, Callery P, Feraud M, et al. Citizen  
655 Science as an Approach for Overcoming Insufficient Monitoring and Inadequate Stakeholder  
656 Buy-in in Adaptive Management: Criteria and Evidence. *Ecosystems* [Internet]. 2015 Apr 1  
657 [cited 2023 Oct 2];18(3):493–506. Available from:  
658 <https://link.springer.com/article/10.1007/s10021-015-9842-4>
- 659 23. Cetas ER, Yasué M. A systematic review of motivational values and conservation success in  
660 and around protected areas. *Conserv Biol* [Internet]. 2017 Feb 1 [cited 2023 Aug  
661 28];31(1):203–12. Available from: <https://pubmed.ncbi.nlm.nih.gov/27254293/>
- 662 24. Lester RT, Ritvo P, Mills EJ, Kariri A, Karanja S, Chung MH, et al. Effects of a mobile phone  
663 short message service on antiretroviral treatment adherence in Kenya (WelTel Kenya1): a  
664 randomised trial. *Lancet* [Internet]. 2010 Nov 27 [cited 2023 Aug 28];376(9755):1838–45.  
665 Available from: <https://pubmed.ncbi.nlm.nih.gov/21071074/>
- 666 25. Ngabo F, Nguimfack J, Nwaigwe F, Mugeni C, Muhoza D, Wilson DR, et al. Designing and  
667 Implementing an Innovative SMS-based alert system (RapidSMS-MCH) to monitor  
668 pregnancy and reduce maternal and child deaths in Rwanda. *Pan Afr Med J* [Internet]. 2012  
669 [cited 2023 Aug 28];13. Available from: [/pmc/articles/PMC3542808/](https://pubmed.ncbi.nlm.nih.gov/21071074/)

- 670 26. Richter A, Comay O, Svenningsen CS, Larsen JC, Hecker S, Tøttrup AP, et al. Motivation  
671 and support services in citizen science insect monitoring: A cross-country study. *Biol*  
672 *Conserv.* 2021 Nov 1;263.
- 673 27. Tomlinson M, Solomon W, Singh Y, Doherty T, Chopra M, Ijumba P, et al. The use of mobile  
674 phones as a data collection tool: a report from a household survey in South Africa. *BMC Med*  
675 *Inform Decis Mak* [Internet]. 2009 [cited 2023 Aug 28];9(1). Available from:  
676 <https://pubmed.ncbi.nlm.nih.gov/20030813/>
- 677 28. Bell S, Marzano M, Cent J, Kobierska H, Podjed D, Vandzinskaite D, et al. What counts?  
678 Volunteers and their organisations in the recording and monitoring of biodiversity. *Biodivers*  
679 *Conserv.* 2008 Dec 26;17(14):3443–54.
- 680 29. Finkelstien MA. Intrinsic vs Extrinsic Motivational Orientations and the Volunteer Process.  
681 *Pers Individ Dif* [Internet]. 2009 Jan 1 [cited 2023 Aug 28];46(5–6):653. Available from:  
682 [https://digitalcommons.usf.edu/psy\\_facpub/770](https://digitalcommons.usf.edu/psy_facpub/770)
- 683 30. Hobbs SJ, White PCL. Motivations and barriers in relation to community participation in  
684 biodiversity recording. *J Nat Conserv* [Internet]. 2012 Dec [cited 2023 Aug 28];20(6):364–73.  
685 Available from: [https://pure.york.ac.uk/portal/en/publications/motivations-and-barriers-in-](https://pure.york.ac.uk/portal/en/publications/motivations-and-barriers-in-relation-to-community-participation-i)  
686 [relation-to-community-participation-i](https://pure.york.ac.uk/portal/en/publications/motivations-and-barriers-in-relation-to-community-participation-i)
- 687 31. Jordan Raddick M, Bracey G, Gay PL, Lintott CJ, Cardamone C, Murray P, et al. Galaxy zoo:  
688 Motivations of citizen scientists. *Astronomy Education Review.* 2013;12(1).
- 689 32. Cerasoli CP, Nicklin JM, Ford MT. Intrinsic motivation and extrinsic incentives jointly predict  
690 performance: A 40-year meta-analysis. *Psychol Bull.* 2014;140(4):980–1008.
- 691 33. Patall EA, Cooper H, Robinson JC. The effects of choice on intrinsic motivation and related  
692 outcomes: a meta-analysis of research findings. *Psychol Bull* [Internet]. 2008 Mar [cited 2023  
693 Aug 28];134(2):270–300. Available from: <https://pubmed.ncbi.nlm.nih.gov/18298272/>
- 694 34. Dam R, Mponzi W, Msaky D, Mwandiyala T, Kaindoa EW, Sinka ME, et al. What incentives  
695 encourage local communities to collect and upload mosquito sound data by using  
696 smartphones? A mixed methods study in Tanzania. *Glob Health Res Policy.* 2023 Dec 1;8(1).

- 697 35. Sinka ME, Zilli D, Li Y, Kiskin I, Msaky D, Kihonda J, et al. HumBug – An Acoustic Mosquito  
698 Monitoring Tool for use on budget smartphones. *Methods Ecol Evol* [Internet]. 2021 Oct 1  
699 [cited 2023 Aug 28];12(10):1848–59. Available from:  
700 <https://onlinelibrary.wiley.com/doi/full/10.1111/2041-210X.13663>
- 701 36. Kiskin I, Zilli D, Li Y, Sinka M, Willis K, Roberts S. Bioacoustic detection with wavelet-  
702 conditioned convolutional neural networks. *Neural Comput Appl*. 2020 Feb 1;32(4):915–27.
- 703 37. Li Y, Kiskin I, Zilli D, Sinka M, Chan H, Willis K, et al. Cost-sensitive detection with variational  
704 autoencoders for environmental acoustic sensing. 2017 Dec 6 [cited 2023 Dec 7]; Available  
705 from: <http://arxiv.org/abs/1712.02488>
- 706 38. Kiskin I, Orozco BP, Windebank T, Zilli D, Sinka M, Willis K, et al. Mosquito Detection with  
707 Neural Networks: The Buzz of Deep Learning. 2017 May 15 [cited 2023 Dec 7]; Available  
708 from: <http://arxiv.org/abs/1705.05180>
- 709 39. Li Y, Zilli D, Chan H, Kiskin I, Sinka M, Roberts S, et al. Mosquito detection with low-cost  
710 smartphones: data acquisition for malaria research. 2017 Nov 16 [cited 2023 Dec 7];  
711 Available from: <http://arxiv.org/abs/1711.06346>
- 712 40. Kiskin I, Cobb AD, Sinka M, Willis K, Roberts SJ. Automatic Acoustic Mosquito Tagging with  
713 Bayesian Neural Networks. *Lecture Notes in Computer Science (including subseries Lecture*  
714 *Notes in Artificial Intelligence and Lecture Notes in Bioinformatics)*. 2021;12978 LNAI:351–  
715 66.
- 716 41. Kiskin I, Cobb AD, Wang L, Roberts S. Humbug Zooniverse: A Crowd-Sourced Acoustic  
717 Mosquito Dataset. *ICASSP, IEEE International Conference on Acoustics, Speech and Signal*  
718 *Processing - Proceedings*. 2020 May 1;2020-May:916–20.
- 719 42. Li Y, Kiskin I, Sinka M, Zilli D, Chan H, Herreros-Moya E, et al. Fast mosquito acoustic  
720 detection with field cup recordings: an initial investigation. *dcase.community* [Internet]. 2018  
721 [cited 2024 Aug 16]; Available from:  
722 [https://dcase.community/documents/workshop2018/proceedings/DCASE2018Workshop\\_Li\\_1](https://dcase.community/documents/workshop2018/proceedings/DCASE2018Workshop_Li_1)  
723 36.pdf

- 724 43. Centers for Disease Control and Prevention. CDC in the Democratic Republic of the Congo |  
725 Global Health | CDC [Internet]. 2023 [cited 2023 Aug 28]. Available from:  
726 <https://www.cdc.gov/globalhealth/countries/drc/default.htm>
- 727 44. World Health Organisation. World malaria report 2022 [Internet]. 2022 [cited 2023 Aug 28].  
728 Available from: [https://www.who.int/teams/global-malaria-programme/reports/world-malaria-](https://www.who.int/teams/global-malaria-programme/reports/world-malaria-report-2022)  
729 [report-2022](https://www.who.int/teams/global-malaria-programme/reports/world-malaria-report-2022)
- 730 45. SimpleMaps.com. "Democratic Republic of the Congo (DRC) GIS Data." *SimpleMaps.com*,  
731 2024, <https://simplemaps.com/gis/country/cd#admin1>. Accessed 16 Oct. 2024. Licensed  
732 under Creative Commons Attribution License. <https://creativecommons.org/licenses/by/4.0/>
- 733 46. Humanitarian Data Exchange. DRC health data. Humanitarian Data Exchange; 2024.  
734 Available from: <https://data.humdata.org/dataset/drc-health-data>. Accessed on: 14 Oct 2024.
- 735 47. QGIS Development Team. QGIS [3.0.0]. Open Source Geospatial Foundation; 2018.  
736 Available from: <https://qgis.org/en/site/>.
- 737 48. Saldaña Johnny. The Coding Manual for Qualitative Researchers. 2021;1–440.
- 738 49. R Core Team. R: A Language and Environment for Statistical Computing\_. 2023; R  
739 Foundation for Statistical Computing, Vienna, Austria. <<https://www.R-project.org/>>.
- 740 50. Kruskal WH, Wallis WA. Use of ranks in one-criterion variance analysis. *J Am Stat Assoc*.  
741 1952;47:583-621. Available from: <http://dx.doi.org/10.1080/01621459.1952.10483441>.
- 742 51. Dinno A. dunn.test: Dunn's Test of Multiple Comparisons Using Rank Sums. R package.  
743 2024. Available from: <<https://CRAN.R-project.org/package=dunn.test>>.
- 744 52. Wickham H. ggplot2 Elegant Graphics for Data Analysis. Use R! series. 2016;211.
- 745 53. Kerr JM, Bum T, Lapinski MK, Liu RW, Lu Z, Zhao J. The effects of social norms on  
746 motivation crowding: experimental evidence from the Tibetan Plateau. *Int J Commons*  
747 [Internet]. 2019 [cited 2023 Aug 28];13(1):430–54. Available from:  
748 <https://thecommonsjournal.org/articles/10.18352/ijc.882>



- 749 54. Rode J, Gómez-Baggethun E, Krause T. Motivation crowding by economic incentives in  
750 conservation policy: A review of the empirical evidence. *Ecological Economics*. 2015 Sep  
751 1;117:270–82.
- 752 55. Aceves-Bueno E, Adeleye AS, Feraud M, Huang Y, Tao M, Yang Y, et al. The Accuracy of  
753 Citizen Science Data: A Quantitative Review. *Bulletin of the Ecological Society of America*.  
754 2017 Oct;98(4):278–90.
- 755 56. Peter M, Diekötter T, Kremer K. Participant Outcomes of Biodiversity Citizen Science  
756 Projects: A Systematic Literature Review. *Sustainability* 2019, Vol 11, Page 2780 [Internet].  
757 2019 May 15 [cited 2023 Oct 1];11(10):2780. Available from: [https://www.mdpi.com/2071-](https://www.mdpi.com/2071-1050/11/10/2780/htm)  
758 [1050/11/10/2780/htm](https://www.mdpi.com/2071-1050/11/10/2780/htm)
- 759 57. Ganzevoort W, van den Born RJG, Halfman W, Turnhout S. Sharing biodiversity data: citizen  
760 scientists' concerns and motivations. *Biodivers Conserv* [Internet]. 2017 Nov 1 [cited 2023  
761 Oct 1];26(12):2821–37. Available from: [https://link.springer.com/article/10.1007/s10531-017-](https://link.springer.com/article/10.1007/s10531-017-1391-z)  
762 [1391-z](https://link.springer.com/article/10.1007/s10531-017-1391-z)
- 763 58. Prestopnik N, Crowston K. Purposeful gaming & socio-computational systems. In:  
764 *Proceedings of the 17th ACM international conference on Supporting group work*. New York,  
765 NY, USA: ACM; 2012. p. 75–84.

766

767 **S1 Appendix:** The DHS Demographic Survey Administered to Participants

768 **S2 Appendix:** The focus group discussion questions administered pre-trial and post-trial.

769 **S3 Table:** A table of results from comparisons of the demographic survey between study districts,  
770 trial groups overall, and trial groups within each district.

771

772

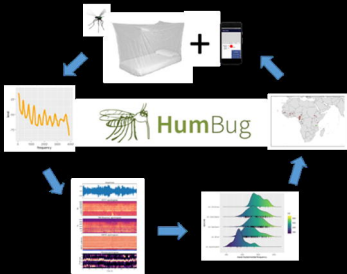

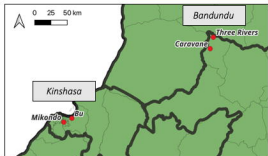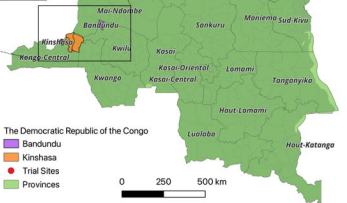

a)

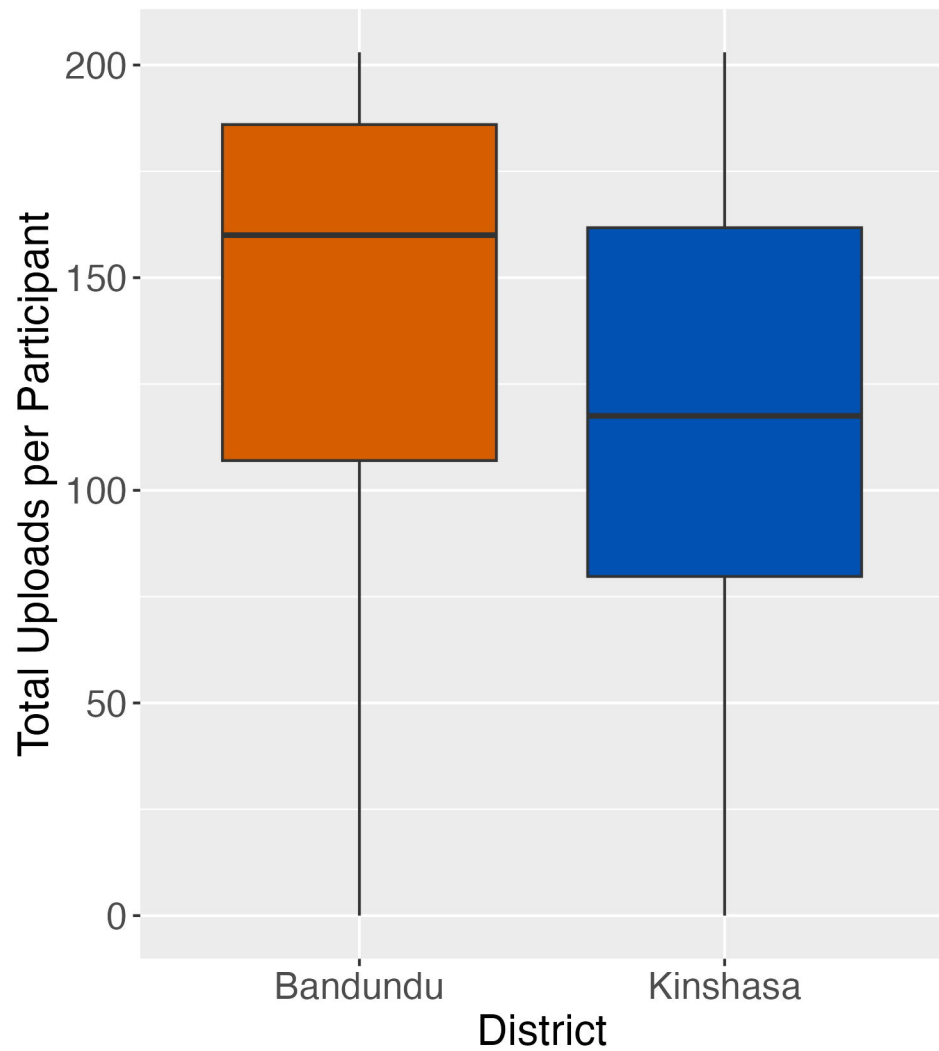

b)

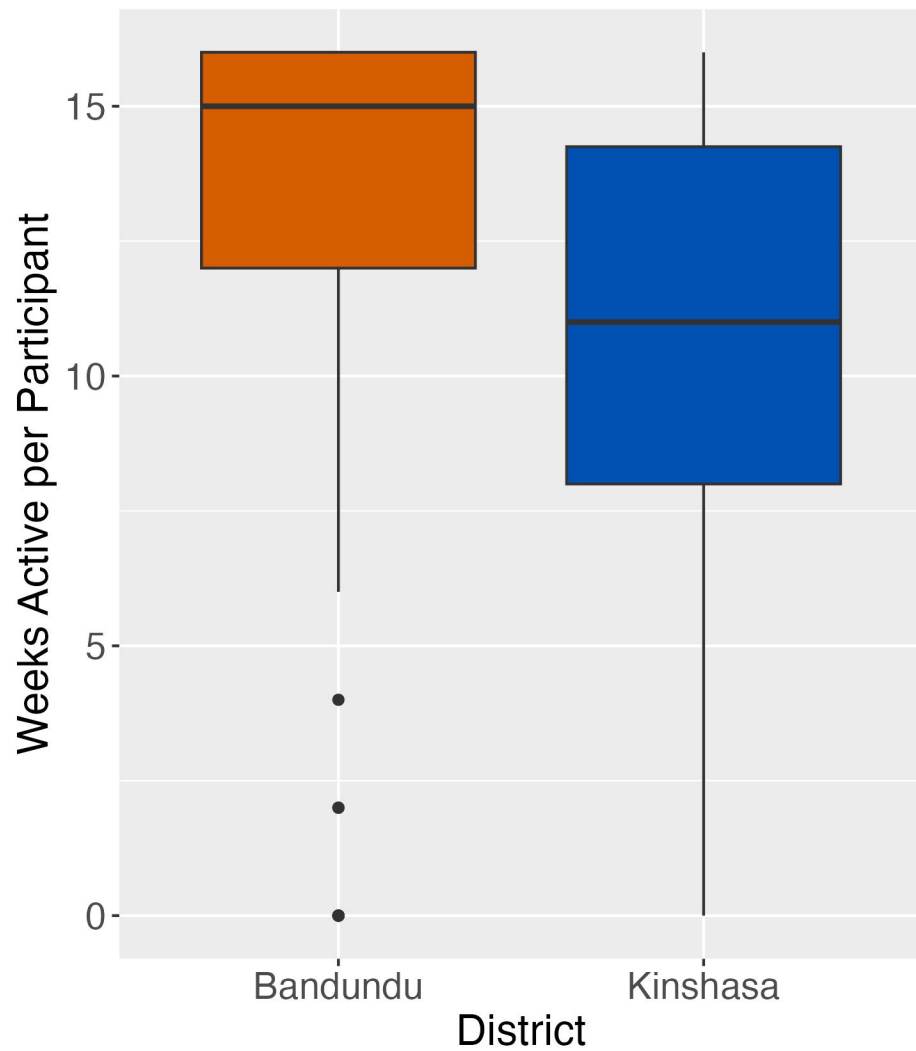

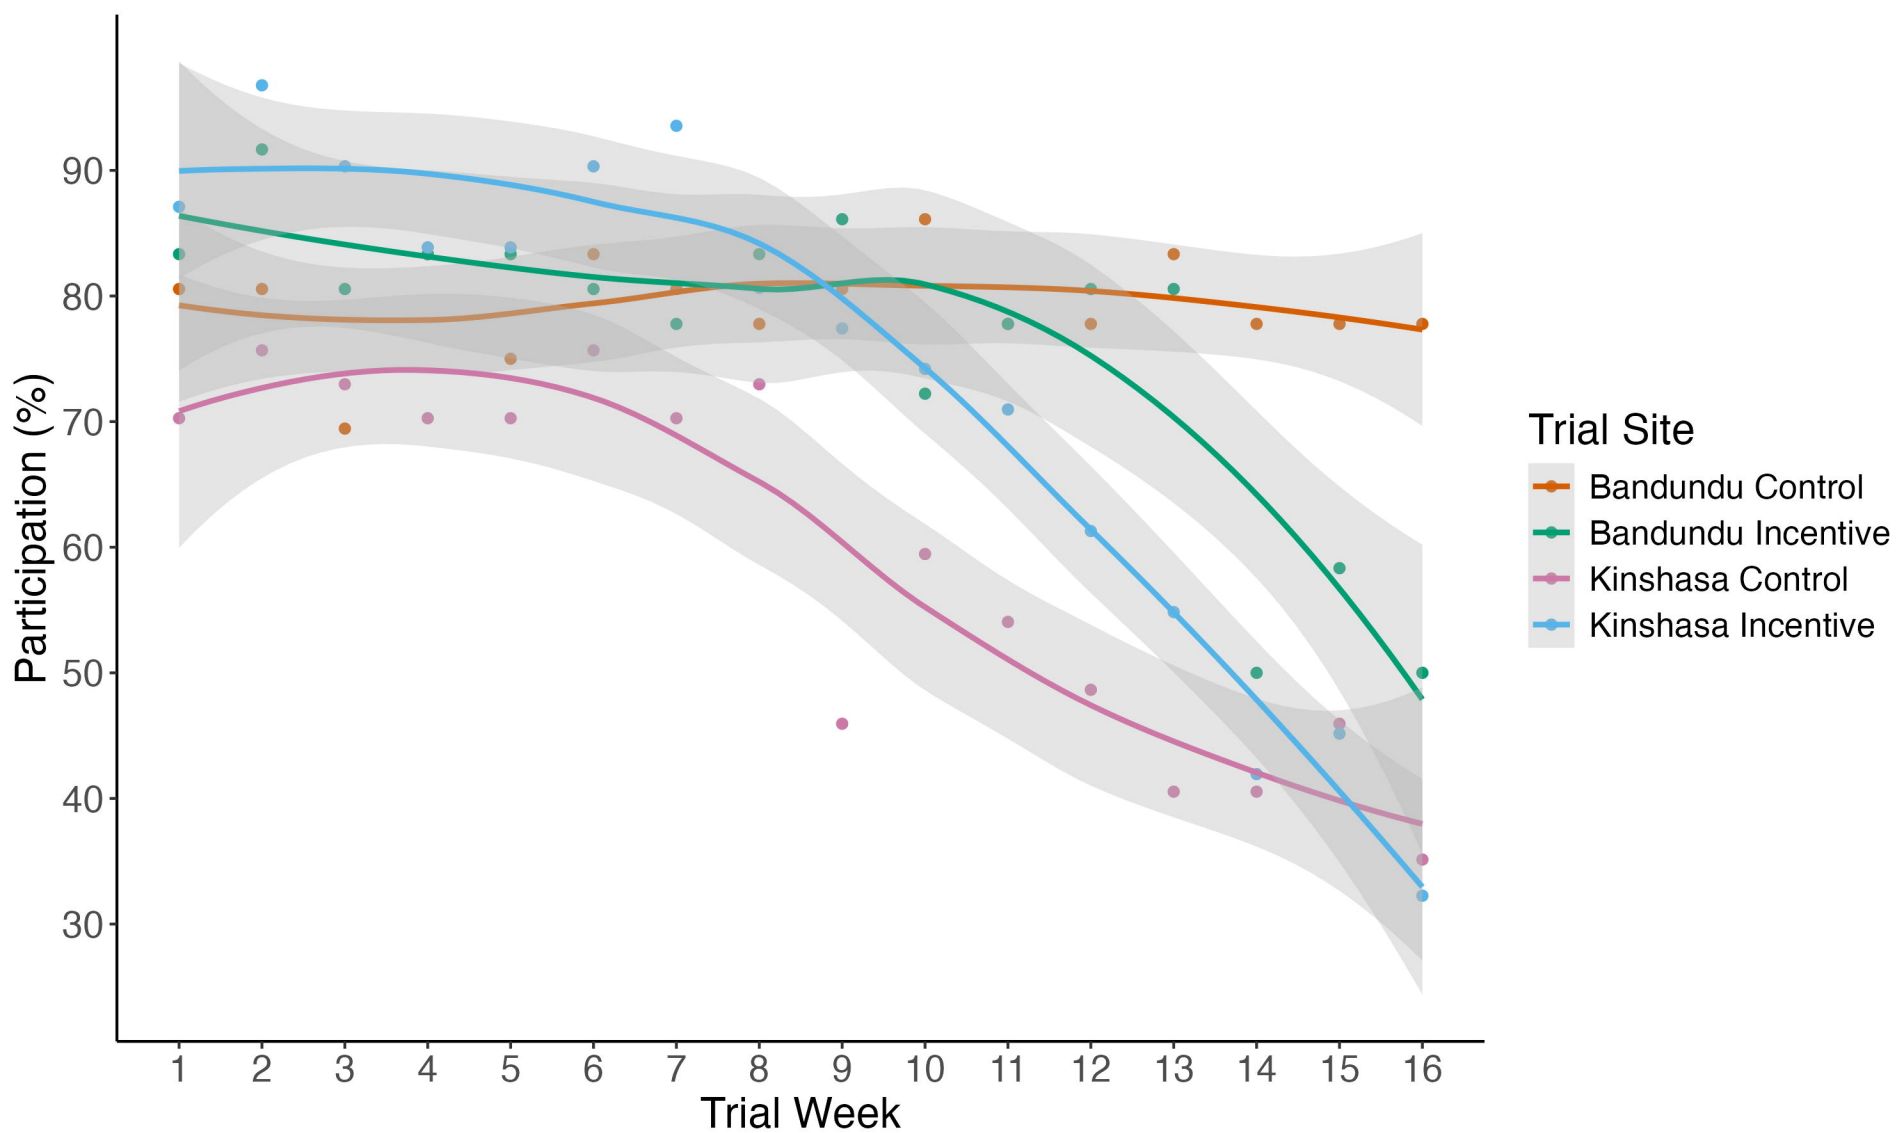

Bandundu vs Kinshasa

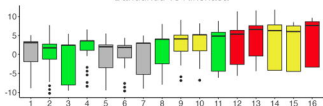

Control vs Incentive

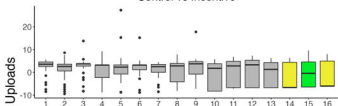

Bandundu Control vs Bandundu Incentive

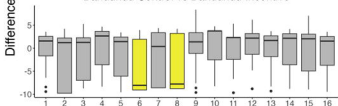

Kinshasa Control vs Kinshasa Incentive

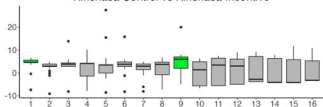

P-Value

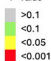

Trial Week
